# Supplementary material for: Unleashing the potential of geostationary satellite observations in air quality forecasting through artificial intelligence techniques
Source: Copernicus journal article supplement (doi:10.5194/acp-25-759-2025), 2025-01-21
Supplement: Supplementary file 1 [file acp-25-759-2025-supplement.pdf]

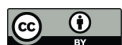

*Supplement of*

## **Unleashing the potential of geostationary satellite observations in air quality forecasting through artificial intelligence techniques**

**Chengxin Zhang et al.**

*Correspondence to:* Cheng Liu (chliu81@ustc.edu.cn)

The copyright of individual parts of the supplement might differ from the article licence.

## 22 **Supplementary Text**

### 23 **S1. Data pre-processing**

#### 24 **Outlier Handling**

25 We conducted outlier handling for each GeoNet input datasets using z-scores, wherein data  
26 normalization was performed based on the mean and standard deviation. Data points exceeding  
27 a certain threshold of z-scores were discarded. The calculation formula is as follows:

$$28 \quad z(x) = \frac{x - \mu_x}{\sigma_x}$$

29 Where  $x$  is the data value,  $\mu_x$  and  $\sigma_x$  are the mean average and standard deviation.

#### 30 **Missing Value Handling**

31 Due to meteorological factors, the GEMS dataset used in this study contains many missing  
32 values. Fig. S1 presents the overall missing ratio of GEMS satellite NO<sub>2</sub> retrieval for each  
33 ground pixel in 2021.

34 To enhance data availability, the GEMS dataset underwent imputation procedures. Various  
35 data imputation methods were employed to assess their impact on the dataset, including zero  
36 imputation, WRF data imputation, and CAMS data imputation. Specifically, missing data  
37 points were replaced with either zero or corresponding data from the WRF and CAMS datasets  
38 at the respective spatiotemporal positions. For other datasets, missing values were addressed  
39 through spatiotemporal interpolation using multidimensional linear interpolation.

#### 40 **Resampling**

41 Due to variations in spatiotemporal resolutions among different datasets, it was necessary to  
42 ensure data consistency and facilitate model computation by resampling all datasets in both  
43 time and space domains. Resampling operations involved both upsampling and downsampling.  
44 Upsampling was achieved through interpolation, while downsampling was performed using  
45 local mean aggregation. Following resampling, the temporal resolution of all datasets was  
46 standardized to 1 hour, and the spatial resolution to 0.1 degrees.

#### 47 **Normalization**

48 The normalization process applied here is beneficial for overcoming overfitting issues during  
49 model training and dealing with heterogeneous data of different scales, thereby potentially  
50 accelerating training speed. This process is essential for bringing each variable to a comparable  
51 scale, ensuring that each feature carries similar importance. In this study, min-max  
52 normalization was applied to all datasets. In this method, the maximum value of the data is

53 transformed to 1, the minimum value to 0, and other values are scaled to decimals between 0  
54 and 1. The calculation method is as follows:

55 
$$x_n = \frac{x - x_{min}}{x_{max} - x_{min}}$$

56 Where  $x$ ,  $x_{max}$ ,  $x_{min}$  is the data value, maximum, and minimum, respectively.

57

## 58 **S2. The definition of model performance metrics**

59 The coefficient of determination ( $R^2$ ):

60 
$$R^2 = \frac{\sum_{i=1}^m (f(x_i) - \bar{y})^2}{\sum_{i=1}^m (y_i - \bar{y})^2}$$

61

62 The root mean square error (RMSE):

63 
$$\sqrt{\frac{1}{n} \sum_{i=1}^n (\hat{y}_i - y_i)^2}$$

64

65 The mean absolute error (MAE):

66 
$$\frac{1}{n} \sum_{i=1}^n |\hat{y}_i - y_i|$$

67

68 The mean absolute percentage error (MAPE):

69 
$$\frac{1}{n} \sum_{i=1}^n \left| \frac{\hat{y}_i - y_i}{y_i} \right|$$

70

71

72 **Supplementary Figures**

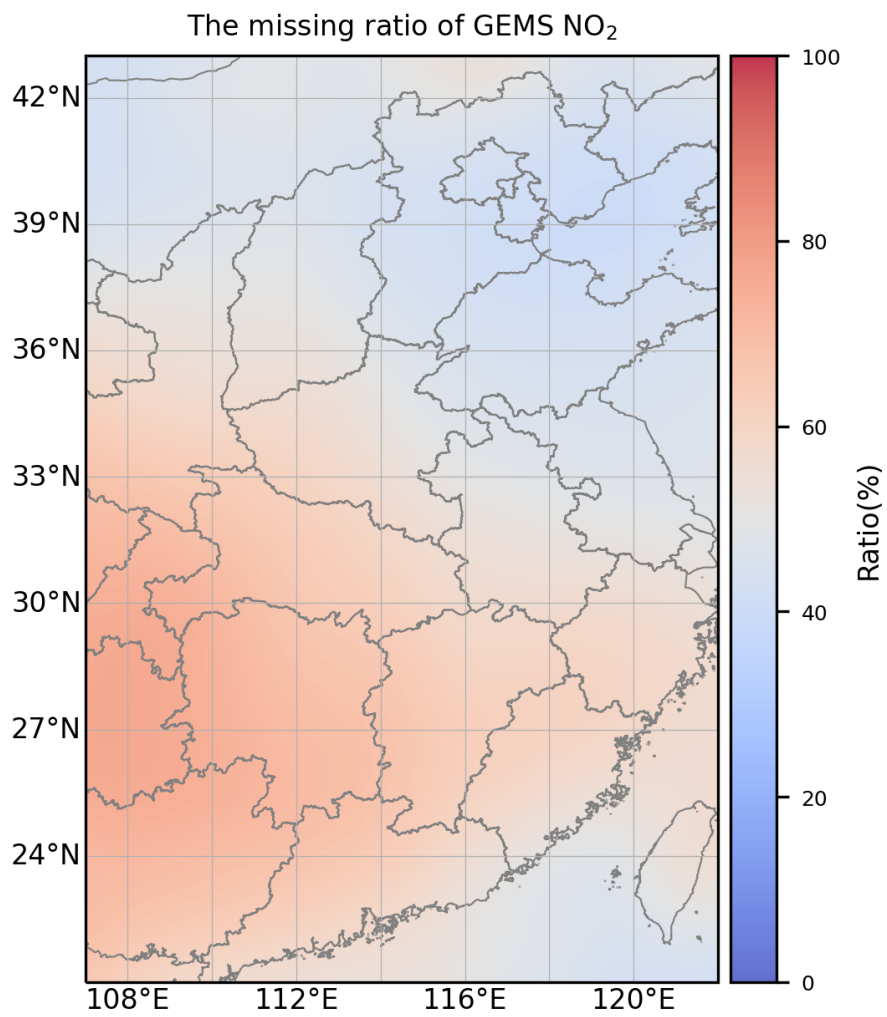

73

74 **Figure S1.** The ratio of missing data for hourly GEMS NO<sub>2</sub> retrievals over East China in 2021.

75

76

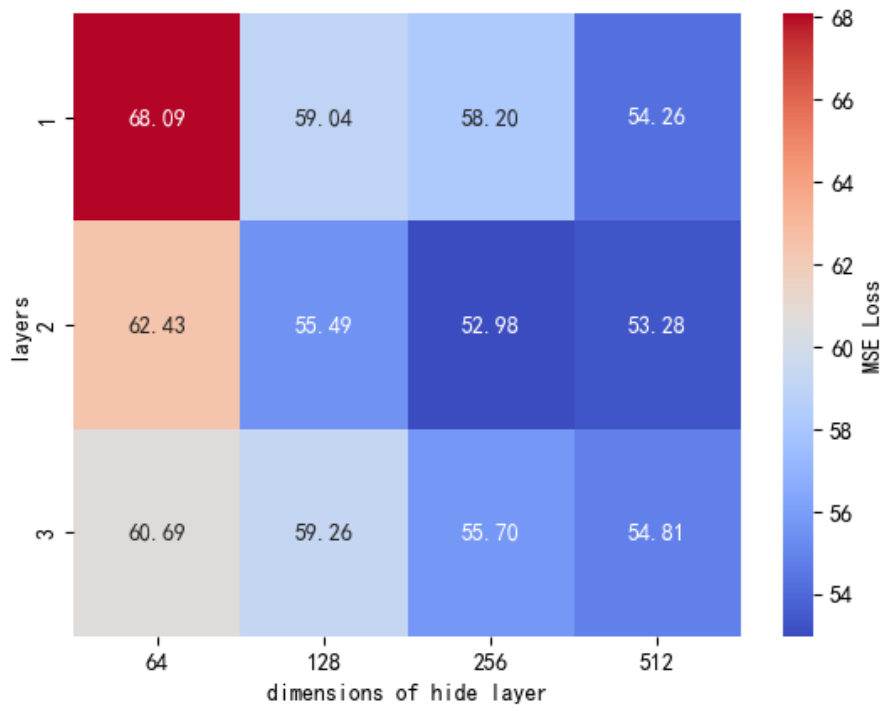

77

78 **Figure S2.** The influence of model hyperparameters including both ConvLSTM layers and dimensions of  
79 hide layer on the MSE loss of GeoNet prediction.

80

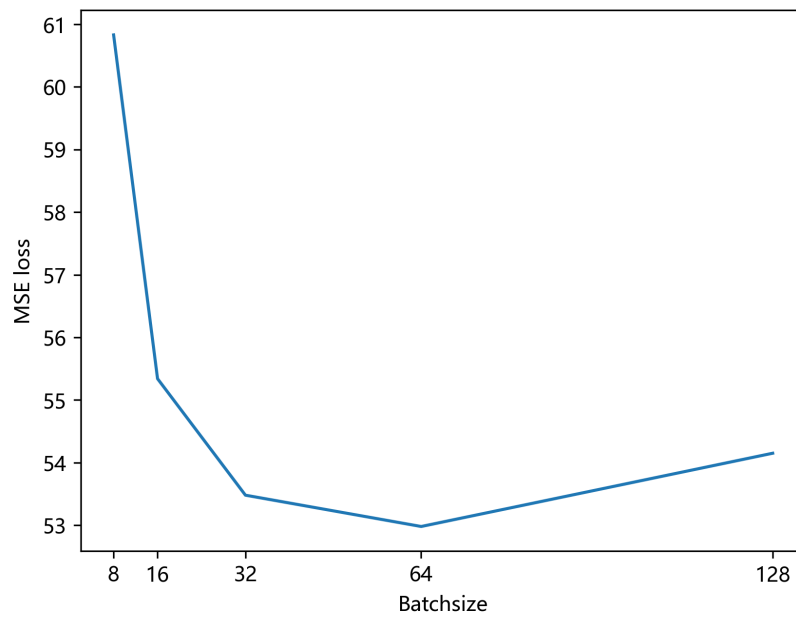

81

82 **Figure S3.** The impact of batch size on the MSE loss of GeoNet prediction.

83

84

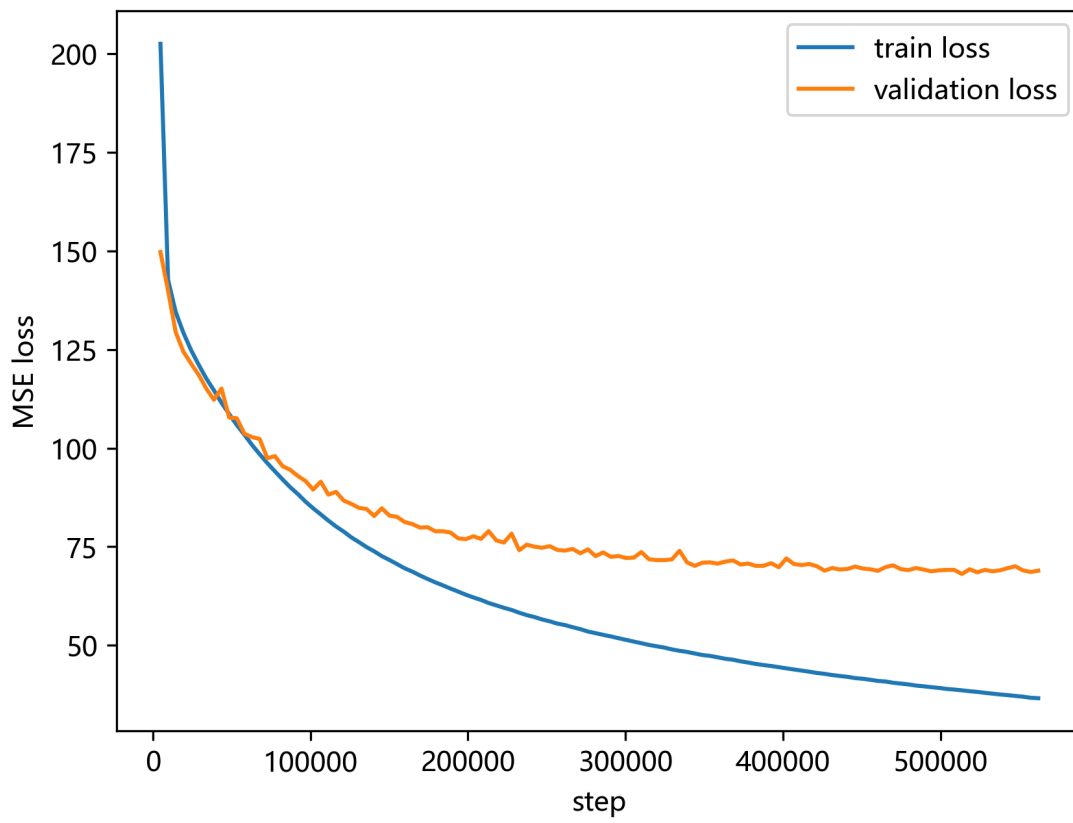

85

86 **Figure S4.** The learning curve of model loss in validation and training datasets for different steps.

87

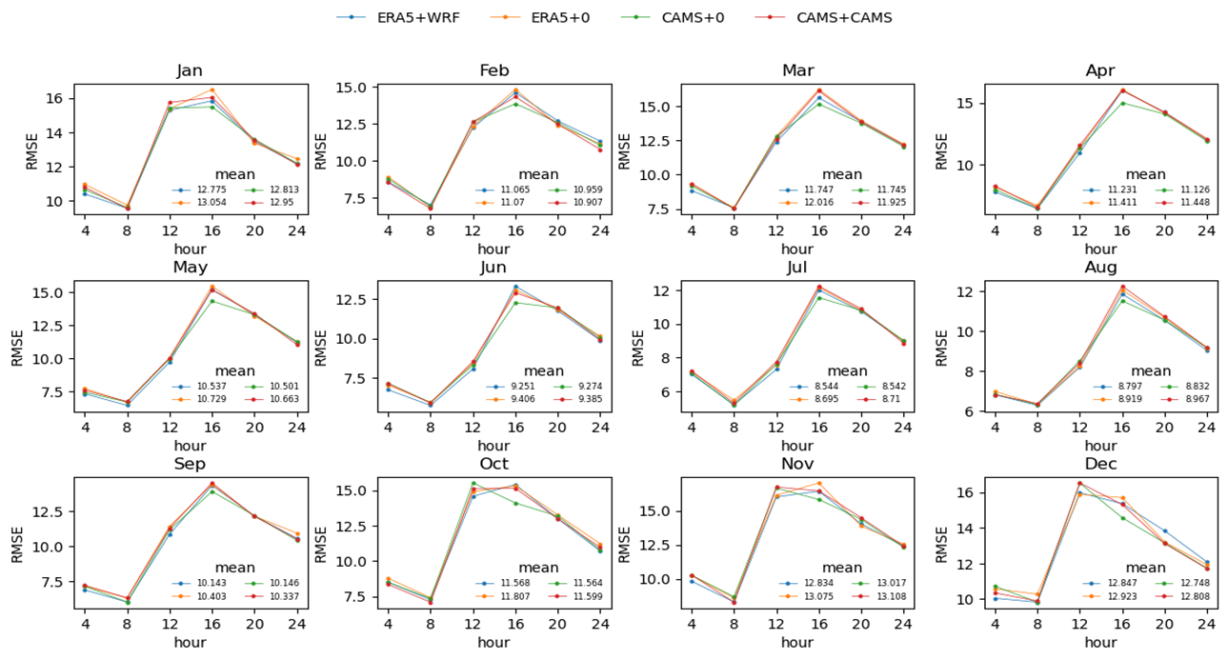

89  
 90 **Figure S5.** The RMSE of GeoNet predicted-NO<sub>2</sub> varies with different prediction step from t+4h to t+24h,  
 91 for different months.



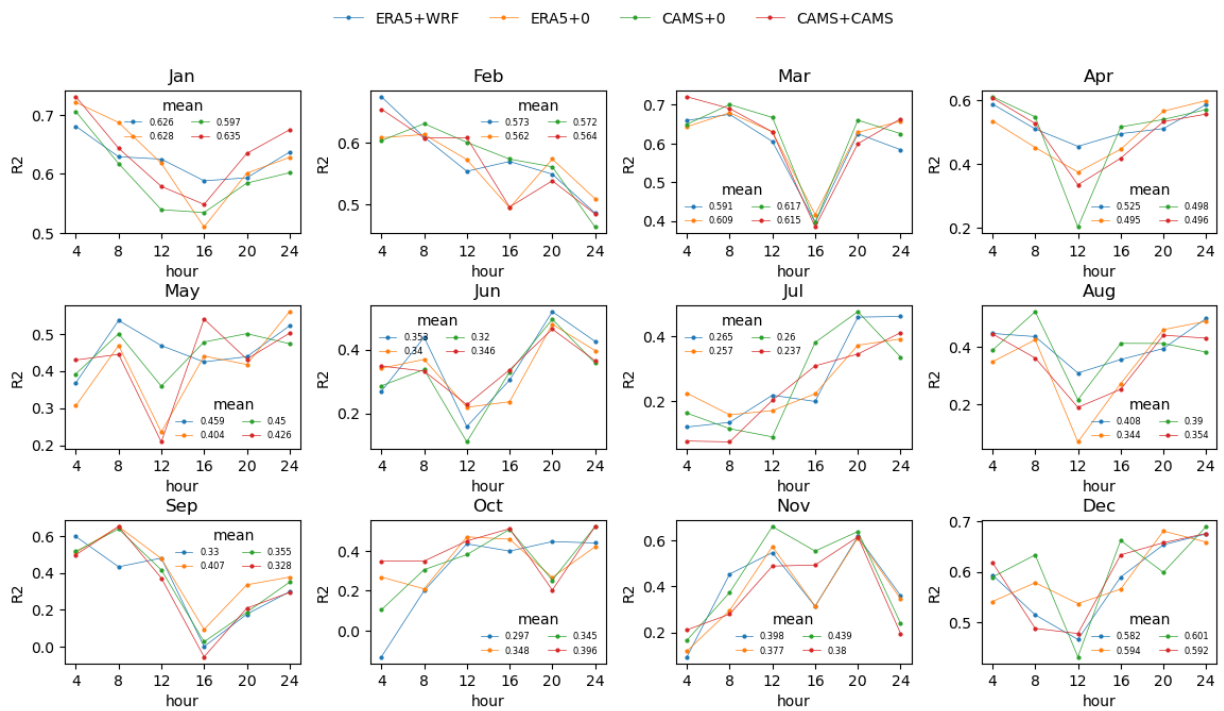

94

95

Figure S6. Similar to Fig. S5, but for  $R^2$ .

96

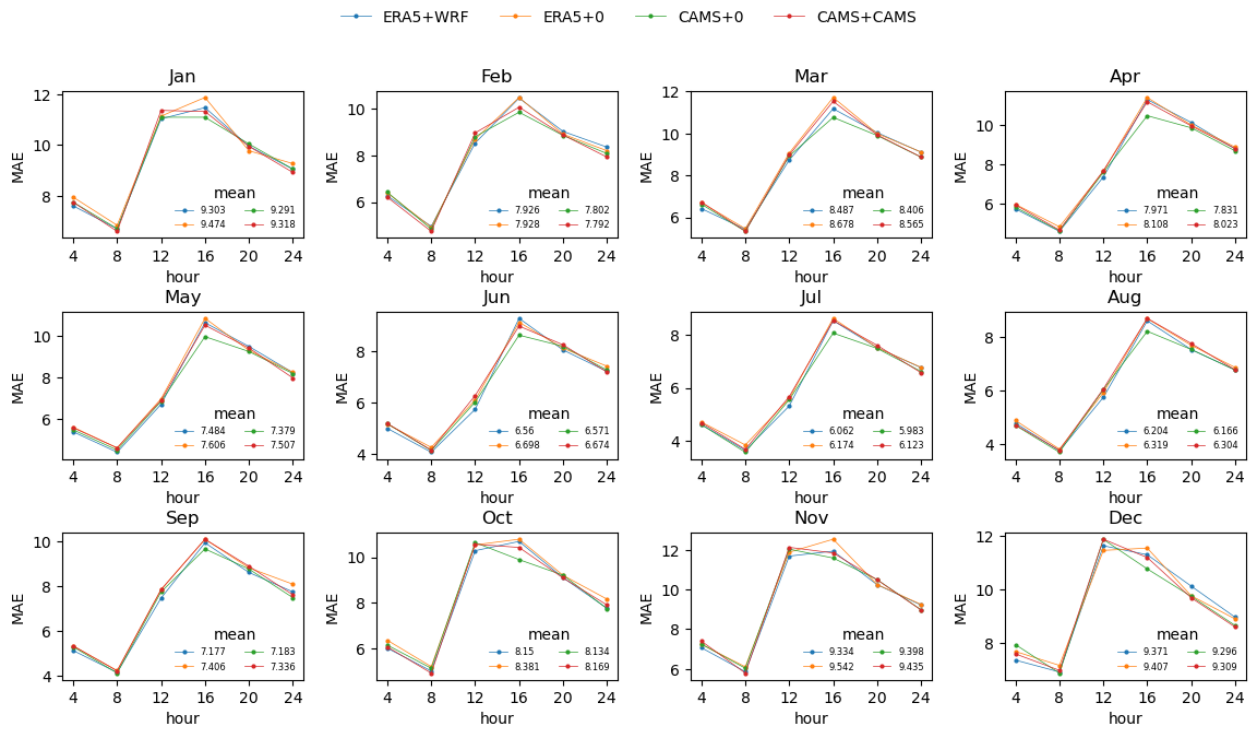

Figure S7. Similar to Fig. S5, but for MAE.

98  
99

100

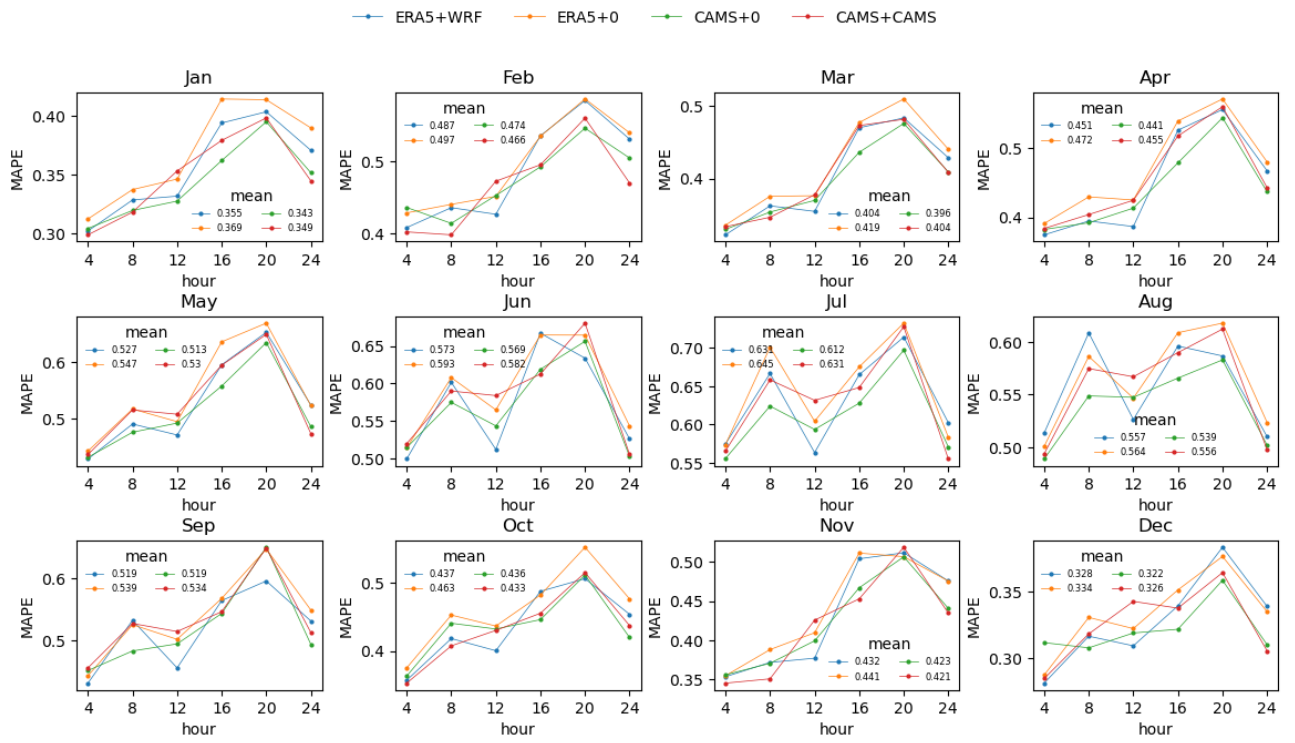

102  
103  
104

Figure S8. Similar to Fig. S5, but for MAPE.

105  
106

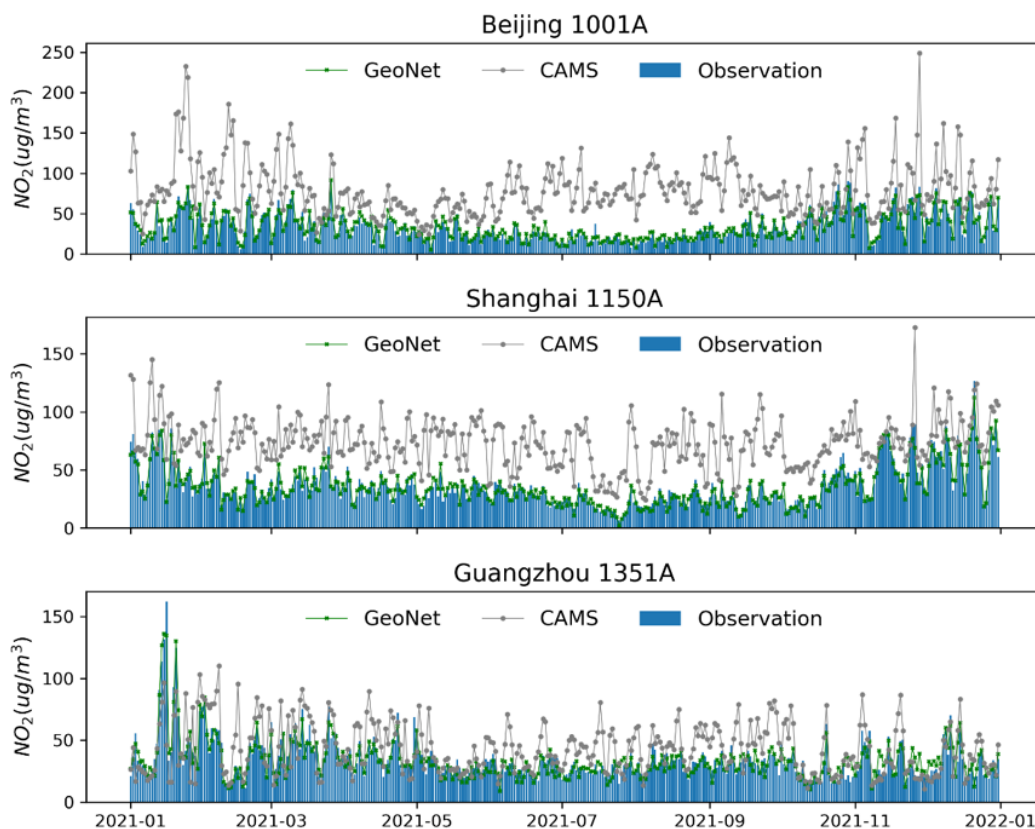

107

108 **Figure S9.** Time series comparison of daily t+4h prediction of surface NO<sub>2</sub> concentration among GeoNet  
109 and CAMS prediction, as well as the CNEMC measurements. These results are shown for one typical site in  
110 (a) Beijing, (b) Shanghai, and (c) Guangzhou, respectively.

111

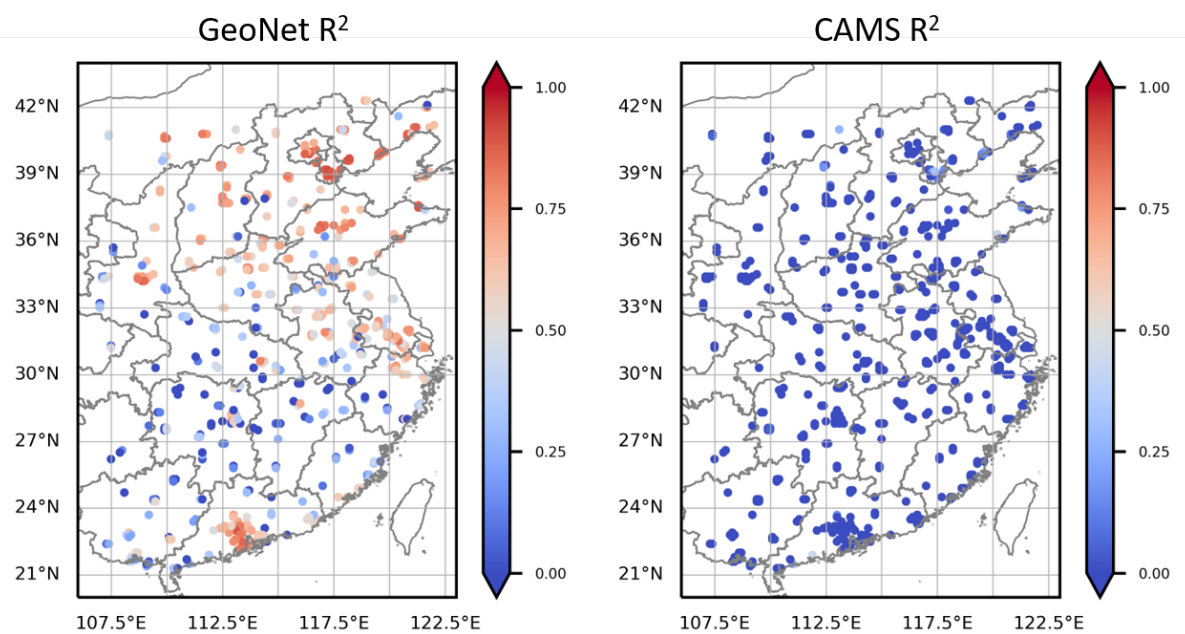

113

114 **Figure S10.** The site-specific Pearson's  $R^2$  between the CNEMC measurements and NO<sub>2</sub> prediction by (a)

115 GeoNet, and (b) CAMS over East China.

116

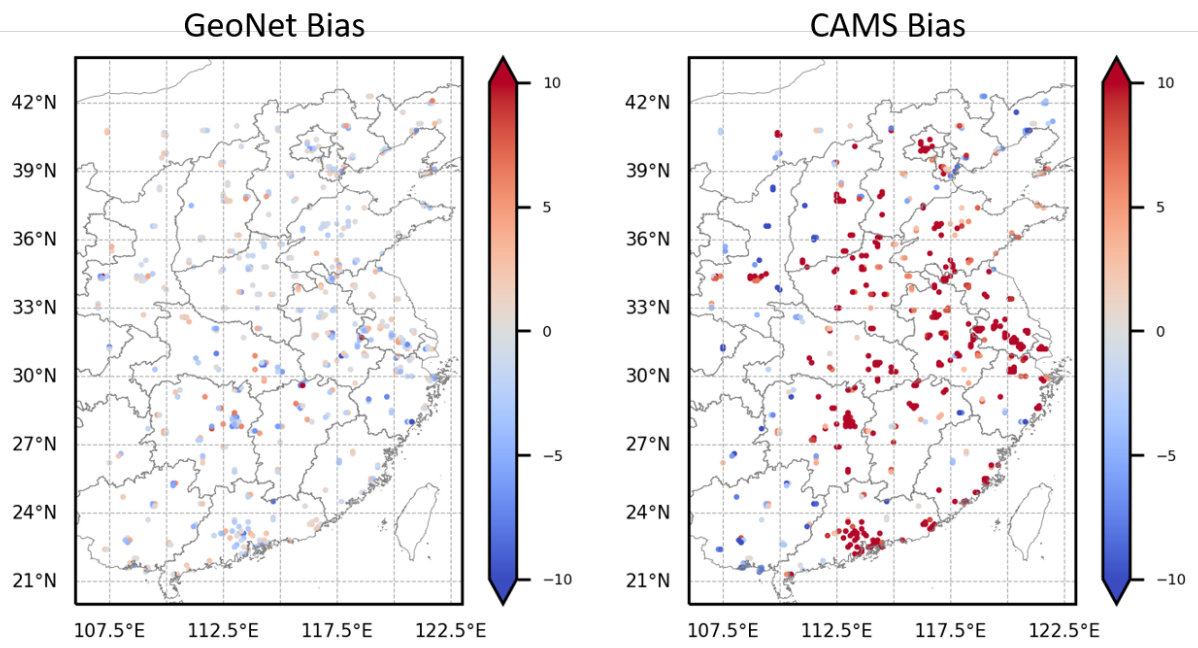

118  
119 **Figure S11.** Similar to Fig. S10, but for RMSE.  
120

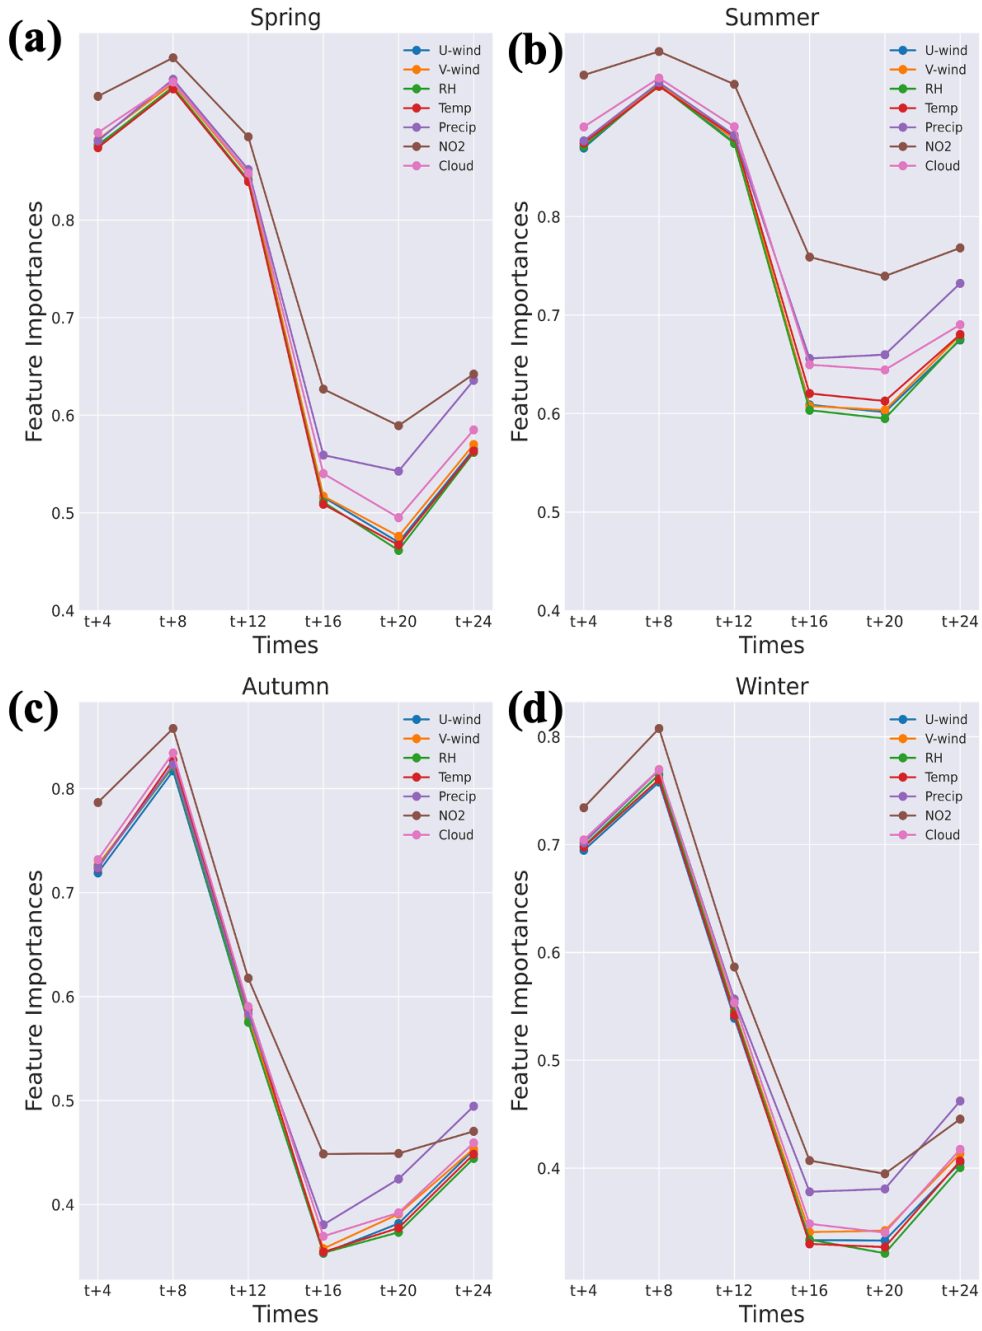

121  
 122 **Figure S12.** Similar to Fig 3a, but for different seasons, including Spring (a), Summer (b),  
 123 Autumn (c), and Winter (d).  
 124
